# Supplementary material
Source: PubMed Central journal article supplement (PMC2716457)
Supplement: mmc1.pdf [file mmc1.pdf]

Biophysical Journal, Volume 96

**Supporting Material**

**Charge Separation, Stabilization, and Protein Relaxation in Photosystem II Core Particles with Closed Reaction Center**

M. Szczepaniak, J. Sander, M. Nowaczyk, M.G. Müller, M. Rögner, and A. R. Holzwarth

## Supplementary Materials

### Charge separation, stabilization, and protein relaxation in photosystem II core particles with closed reaction center

M. Szczepaniak<sup>\*</sup>, J. Sander<sup>#</sup>, M. Nowaczyk<sup>#</sup>, M.G. Müller<sup>\*</sup>, M. Rögner<sup>#</sup> and A. R. Holzwarth<sup>\*</sup>

<sup>\*</sup> Max-Planck-Institut für Bioanorganische Chemie, Stiftstrasse 34-36, D-45470 Mülheim a.d. Ruhr, Germany, and

<sup>#</sup> Lehrstuhl für Biochemie der Pflanzen, Ruhr-Universität Bochum, Universitätsstrasse 150, D-44801 Bochum, Germany

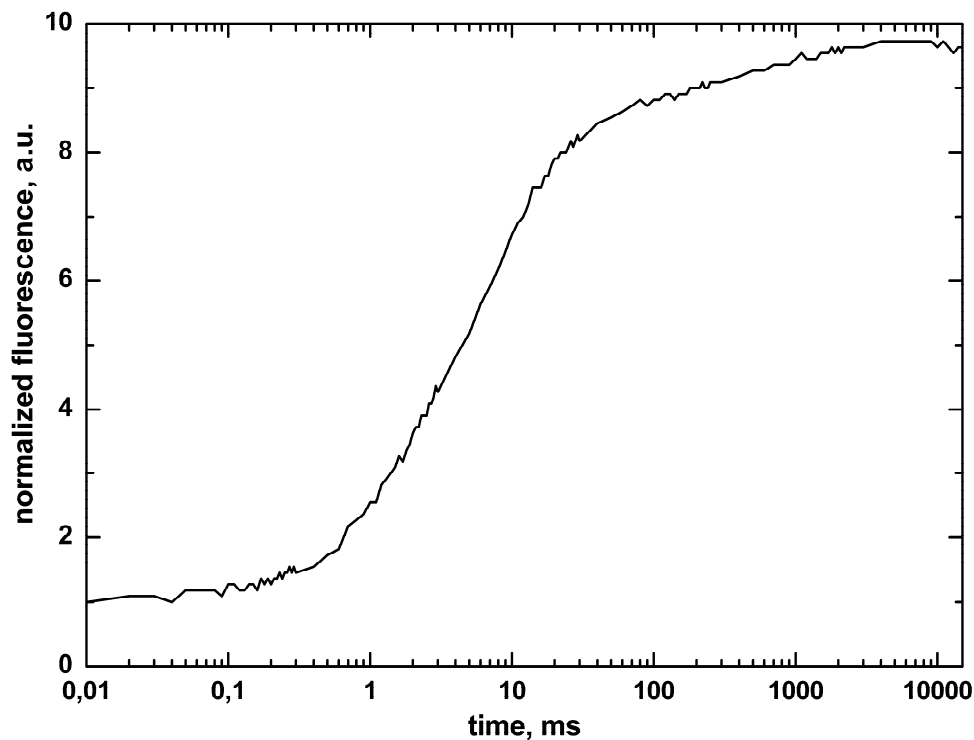

**FIGURE S1:** Chlorophyll *a* fluorescence induction signal from PSII with RC in open state, normalized to the  $F_0$  level. The measurement was carried out with a Handy Pea instrument (Hansatech Instruments, UK). Sample was dark-adapted for 2 min before the measurement and then illuminated with continuous light (650 nm peak wavelength, 1250  $\mu\text{E}/\text{m}^2\text{s}$ ) provided by the focused array of ultra-bright red LED's. The fluorescence data was recorded for 15 seconds.
